# Supplementary material for: Direct anion effects on coordination polymerizations: construction and physicochemical properties of 1D, 2D, and 3D copper(ii) coordination polymers containing 1,3,5-tris(isonicotinoyloxyethyl)cyanurate
Source: Royal Society of Chemistry journal article supplement (doi:10.1039/c3dt51124c), 2013-01-01
Supplement: c3dt51124c.pdf [file c3dt51124c.pdf]

<Electronic Supplementary Information>

**Direct anion effects on the formation of 1D, 2D, and 3D coordination  
polymers: construction and properties of copper(II) complexes containing  
1,3,5-tris(isonicotinoyloxyethyl)cyanurate**

Woosik Hong, Haeri Lee, Tae Hwan Noh and Ok-Sang Jung\*

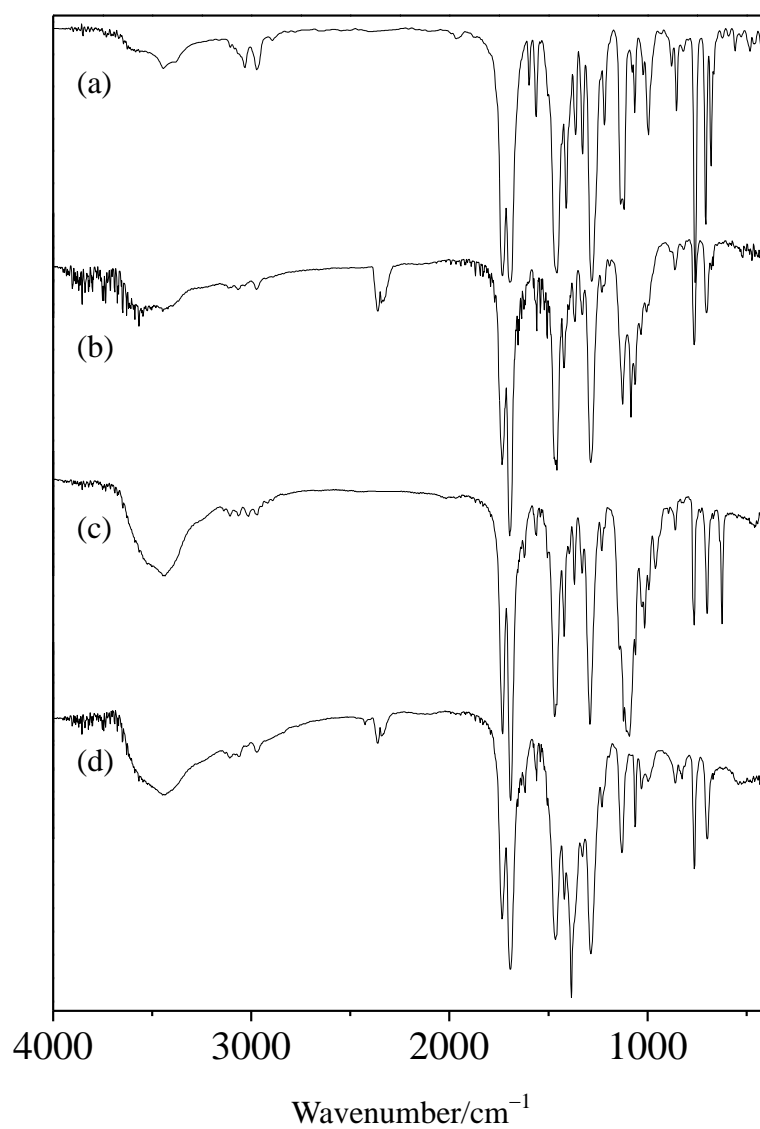

**Fig. S1** IR data of L (a),  $[\text{Cu}(\text{BF}_4)(\text{L})_2(\text{H}_2\text{O})](\text{BF}_4)\cdot 2\text{H}_2\text{O}$  (b),  
 $[\text{Cu}(\text{ClO}_4)(\text{L})(\text{Me}_2\text{SO})_2](\text{ClO}_4)\cdot 2\text{CH}_2\text{Cl}_2$  (c), and  
 $[\text{Cu}_2(\text{NO}_3)_4(\text{L})_2(\text{CH}_3\text{OH})]\cdot 2\text{CH}_2\text{Cl}_2\cdot 2\text{CH}_3\text{OH}$  (d).

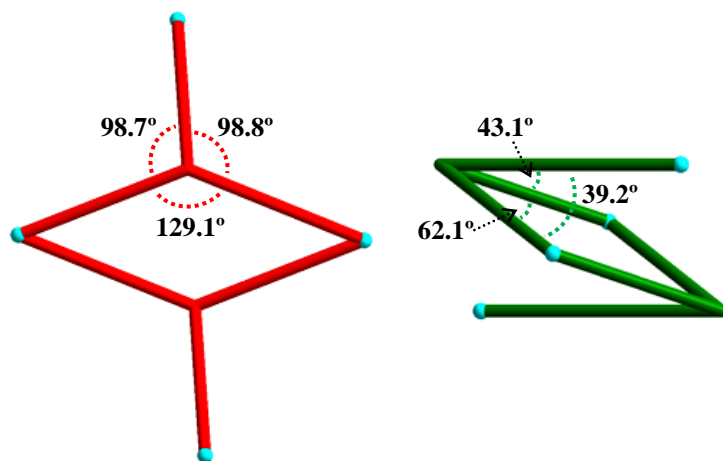

**Fig. S2** Schematic diagrams showing the difference in conformation between L of the layered moiety (red) and the bridging moiety (green) for  $[\text{Cu}_2(\text{NO}_3)_4(\text{L})_2(\text{CH}_3\text{OH})] \cdot 2\text{CH}_2\text{Cl}_2 \cdot 2\text{CH}_3\text{OH}$ .

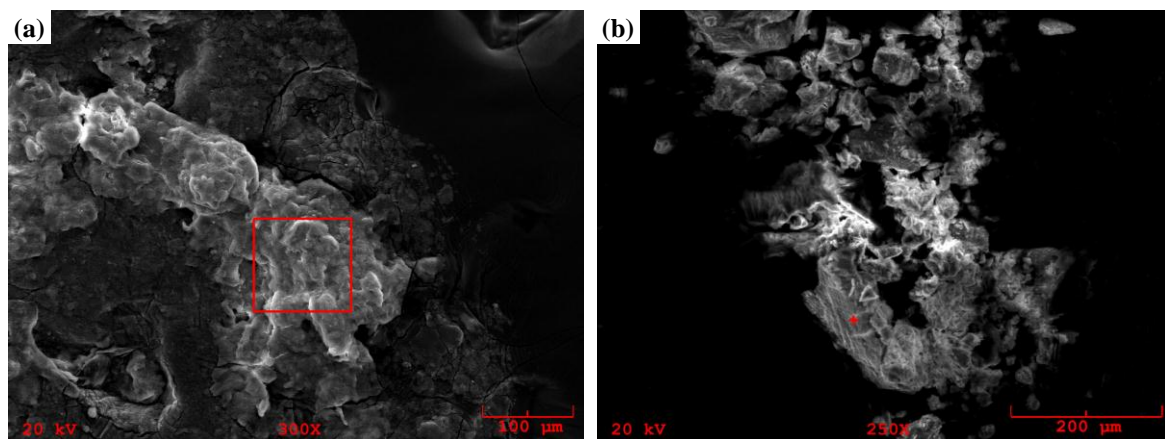

| Element | Atomic% (a) | Atomic% (b) |
|---------|-------------|-------------|
| B       | 3.499       | 3.896       |
| C       | 50.971      | 54.150      |
| N       | 10.880      | 15.058      |
| O       | 25.187      | 19.499      |
| F       | 5.611       | 3.959       |
| Cl      | 2.451       | 2.181       |
| Cu      | 1.401       | 1.257       |
|         | 100.000     | 100.000     |

**Fig. S3** SEM images (top) and SEM-EDX data (bottom) for the anion exchanged species,  $[\text{Cu}(\text{BF}_4)(\text{L})_2(\text{H}_2\text{O})](\text{ClO}_4)$  (a) and  $[\text{Cu}(\text{ClO}_4)(\text{L})(\text{Me}_2\text{SO})_2](\text{BF}_4)$  (b).

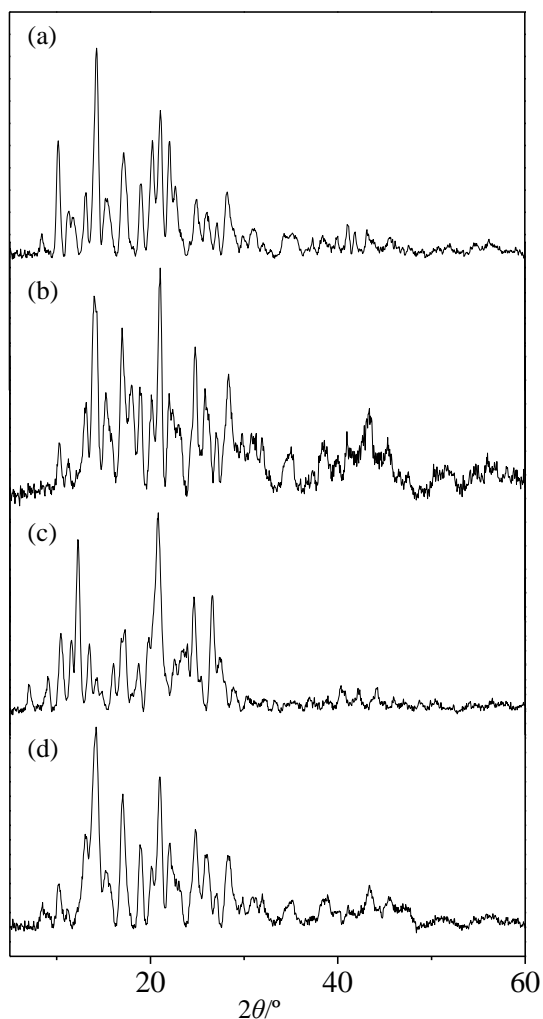

**Fig. S4** Powder XRD data showing the anion exchanges:  $[\text{Cu}(\text{BF}_4)(\text{L})_2(\text{H}_2\text{O})](\text{BF}_4)\cdot 2\text{H}_2\text{O}$  crystal (a) and the anion exchanged species  $[\text{Cu}(\text{BF}_4)(\text{L})_2(\text{H}_2\text{O})](\text{ClO}_4)$  after anion exchange with three equivalents of  $\text{NaClO}_4$  (b);  $[\text{Cu}(\text{ClO}_4)(\text{L})(\text{Me}_2\text{SO})_2](\text{ClO}_4)\cdot 2\text{CH}_2\text{Cl}_2$  crystal (c) and the anion exchanged species  $[\text{Cu}(\text{ClO}_4)(\text{L})(\text{Me}_2\text{SO})_2](\text{BF}_4)$  after anion exchange with three equivalents of  $\text{NaBF}_4$  (d).

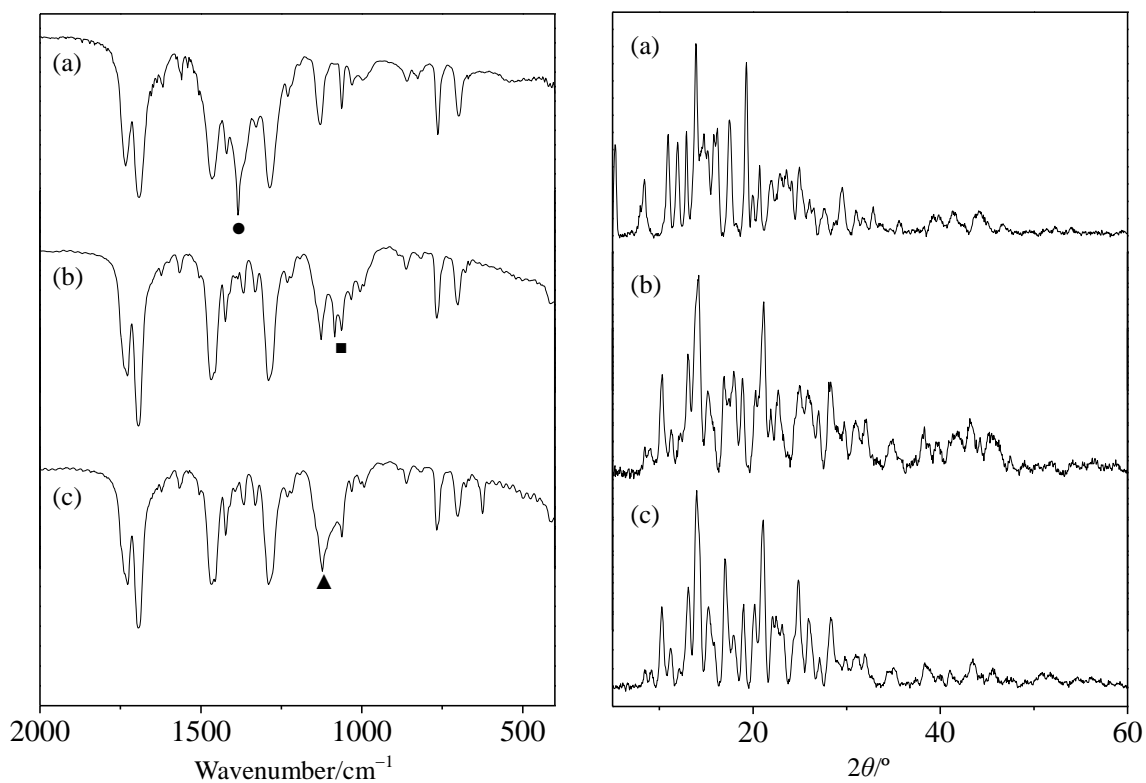

**Fig. S5** IR spectra (left) and powder XRD data (right) of  $[\text{Cu}_2(\text{L})_2(\text{CH}_3\text{OH})(\text{NO}_3)_4] \cdot 2\text{CH}_2\text{Cl}_2 \cdot 2\text{CH}_3\text{OH}$  (a) and the anion exchanged species  $[\text{Cu}_2(\text{BF}_4)_4(\text{L})_2(\text{CH}_3\text{OH})]$  (b) and  $[\text{Cu}_2(\text{ClO}_4)_4(\text{L})_2(\text{CH}_3\text{OH})]$  (c). Circle, square, and triangle indicate the IR bands corresponding to  $\text{NO}_3^-$ ,  $\text{BF}_4^-$  and,  $\text{ClO}_4^-$ , respectively.

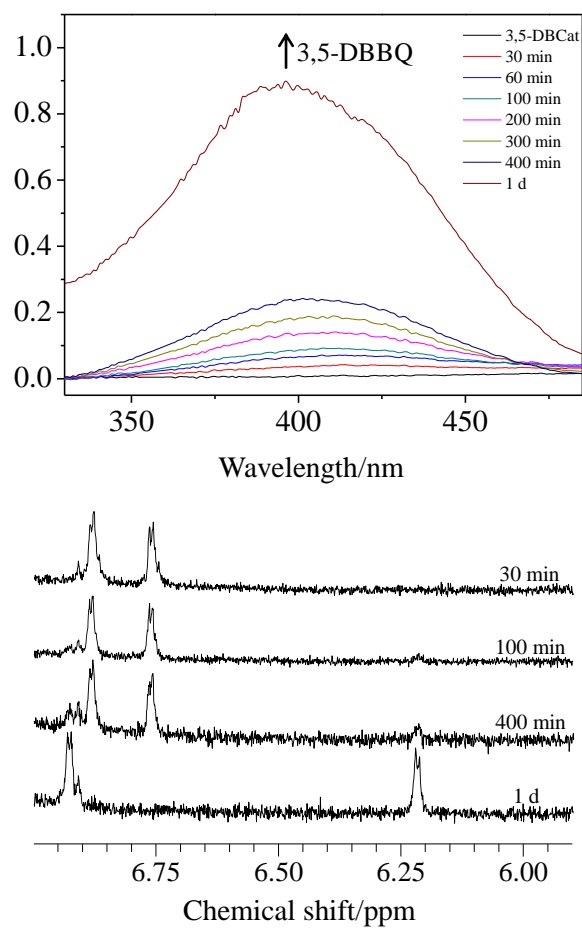

**Fig. S6** UV spectra (in chloroform, top) and partial <sup>1</sup>H NMR spectra (bottom) and showing oxidation of 3,5-di-*tert*-butylcatechol (3,5-DBCat) with 0.2 mol% [Cu(BF<sub>4</sub>)(L)<sub>2</sub>(H<sub>2</sub>O)](BF<sub>4</sub>)·2H<sub>2</sub>O catalysts at 40 °C.

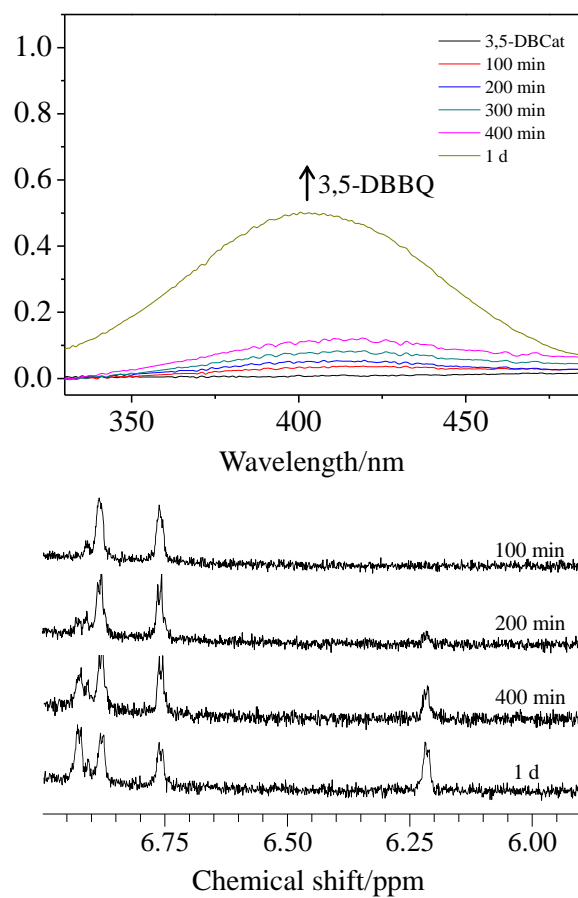

**Fig. S7** UV spectra (in chloroform, top) and partial <sup>1</sup>H NMR spectra (bottom) showing oxidation of 3,5-di-*tert*-butylcatechol (3,5-DBCat) with 0.2 mol% [Cu(ClO<sub>4</sub>)(L)(Me<sub>2</sub>SO)<sub>2</sub>](ClO<sub>4</sub>)·2CH<sub>2</sub>Cl<sub>2</sub> catalysts at 40 °C.



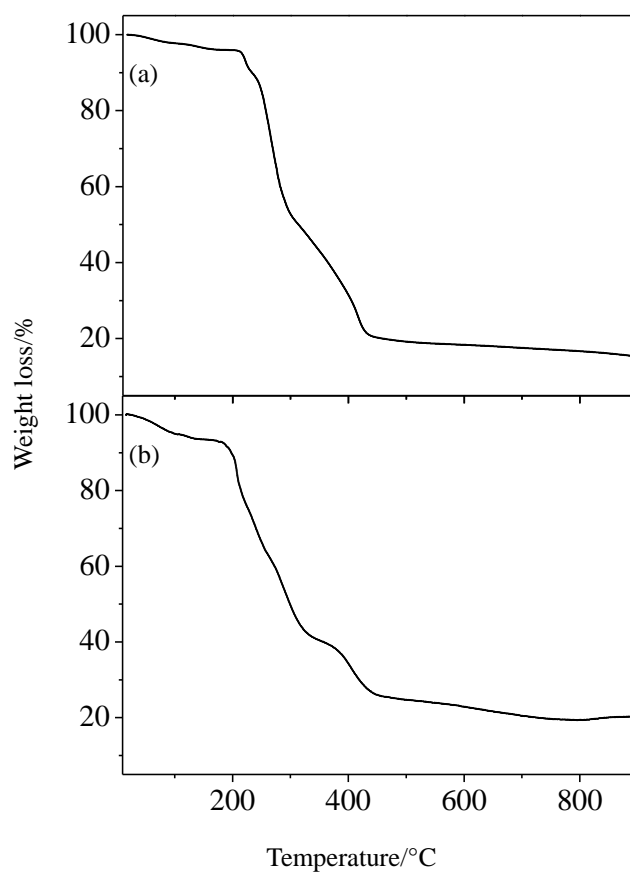

**Fig. S8** TGA curves of  $[\text{Cu}(\text{BF}_4)(\text{L})_2(\text{H}_2\text{O})](\text{BF}_4) \cdot 2\text{H}_2\text{O}$  (a) and  $[\text{Cu}_2(\text{NO}_3)_4(\text{L})_2(\text{CH}_3\text{OH})] \cdot 2\text{CH}_2\text{Cl}_2 \cdot 2\text{CH}_3\text{OH}$  (b).

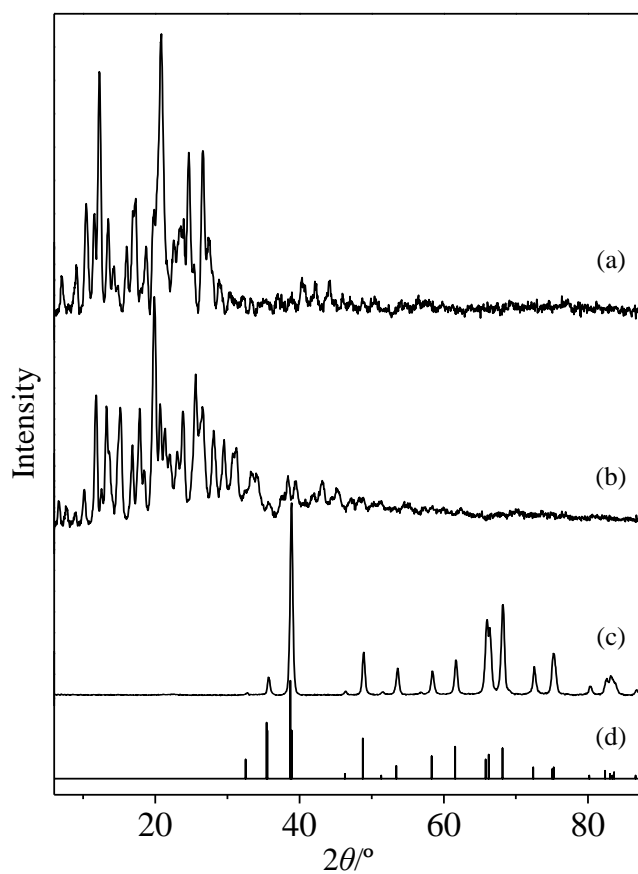

**Fig. S9** Powder XRD patterns for  $[\text{Cu}(\text{ClO}_4)(\text{L})(\text{Me}_2\text{SO})_2](\text{ClO}_4) \cdot 2\text{CH}_2\text{Cl}_2$  (a) and the calcined samples at 200 °C for 1 h (b) and at 600 °C for 2 h (c). (d) represents the reference pattern of CuO from the ICDD database (PDF no. 05-0661).

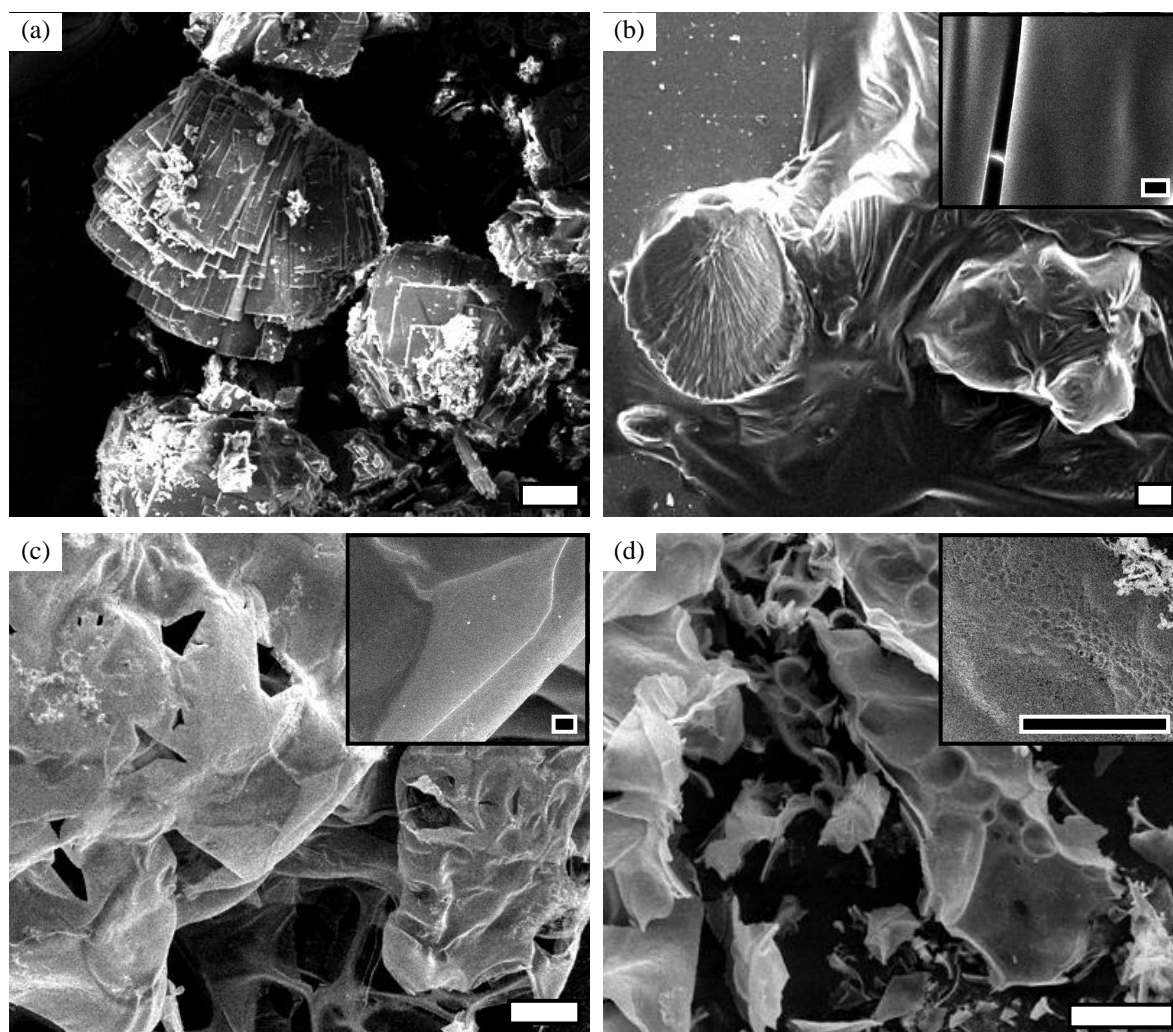

**Fig. S10** Temperature-dependent morphology change of  $[\text{Cu}(\text{BF}_4)(\text{L})_2(\text{H}_2\text{O})](\text{BF}_4)\cdot 2\text{H}_2\text{O}$   
(left): bare crystal (a), calcination at 200 °C for 1 h (b), 400 °C for 1 h (c), and 600 °C for 2 h  
(d). Inset: magnified images. White bar = 100  $\mu\text{m}$ ; black bar = 10  $\mu\text{m}$ .

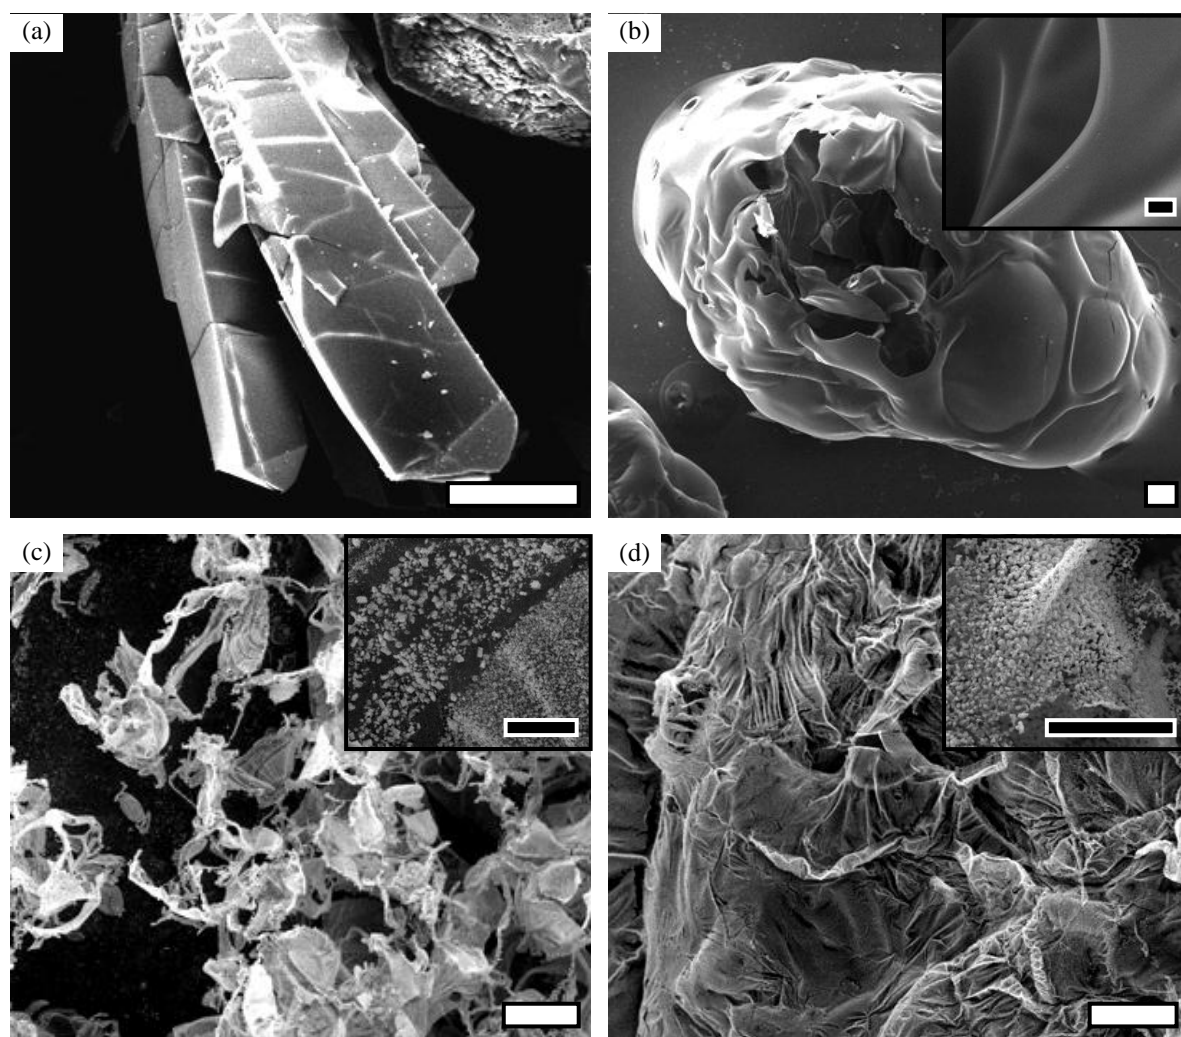

**Fig. S11** Temperature-dependent morphology change of

$[\text{Cu}_2(\text{NO}_3)_4(\text{L})_2(\text{CH}_3\text{OH})] \cdot 2\text{CH}_2\text{Cl}_2 \cdot 2\text{CH}_3\text{OH}$ : bare crystal (a), calcination at 200 °C for 1 h (b), 400 °C for 1 h (c), and 600 °C for 2 h (d). Inset: magnified images. White bar = 100  $\mu\text{m}$ ; black bar = 10  $\mu\text{m}$ .
